# Supplementary material
Source: PubMed Central journal article supplement (PMC4466049)
Supplement: NIHMS666173-supplement-supplement_1.pdf [file NIHMS666173-supplement-supplement_1.pdf]

**Table S1. Variants in the *CARD14* gene in patients with sporadic PRP**

| SNP rs      | Variant      |          |            | Minor allele frequency |
|-------------|--------------|----------|------------|------------------------|
|             | cDNA         | Codon    | Amino acid |                        |
| rs9895931   | c.27C>C/T    | TCC>TCT  | p.S9S      | T: 0.0%                |
| rs114688446 | c.599G>G/A   | AGC>AAC  | p.S200N    | T: 0.8%                |
| rs4889990   | c.633G>A     | GAG>GAA  | p.E211E    | A: 37.9%               |
| rs28674001  | c.676-6G>A*  |          |            | A: 37.4%               |
| rs142246283 | c.683T>T/G   | CTA>CGA  | p.L228R    | no data                |
| rs61751629  | c.1264G>A    | GAG>AAG  | p.E422K    | A: 2.1%                |
| rs11658460  | c.1323C>T    | GAC>GAT  | p.D441D    | T: 10.2%               |
| rs34367357  | c.1753G>A    | GTC>ATC  | p.V585I    | A: 5.2%                |
| rs2066964   | c.1641G>C    | AGG>AGC  | p.R547S    | C: 65.1%               |
| rs117918077 | c.2044C>C/T  | CGG>TGG  | p.R682W    | T: 1.2%                |
| rs11653893  | c.2399-4A>G* |          |            | G: 40.4%               |
| no data     | c.2406C>C/A  | AGC>AGA  | p.S802R    | no data                |
| rs11652075  | c.2458C>T    | CGG>TGG  | p.R820W    | T: 39.9%               |
| rs61757652  | c.2481C>T    | CCC>CCT  | p.P827P    | T: 6.2%                |
| rs139789664 | c.2495C>T,   | CTC>CTT, | p.L832L    | T: 0.5%                |

\* Intronic sequences
